# Supplementary material for: Diverse Associations of Plasma Selenium Concentrations and SELENOP Gene Polymorphism with Metabolic Syndrome and Its Components
Source: Hindawi journal article supplement (doi:10.1155/2020/5343014), 2020-04-23
Supplement: f1 [file 5343014.f1.pdf]

## Supplemental Material

### Diverse associations of plasma selenium concentrations, SELENOP gene polymorphism with metabolic syndrome and its components

Li Zhou <sup>1,2</sup>, Cheng Luo <sup>1,2</sup>, Jiawei Yin <sup>1,2</sup>, Yalun Zhu <sup>1,2</sup>, Peiyun Li <sup>1,2</sup>, Sijing Chen <sup>1,2</sup>, Taoping Sun <sup>1,2</sup>, Manling Xie <sup>3</sup>, Zhilei Shan <sup>1,2,4</sup>,

Benfeng Cao <sup>1,2</sup>, Xueting Hu <sup>1,2</sup>, Ying Rong <sup>5</sup>, Wei Yang <sup>1,2</sup>, Xiaoqin Li <sup>1,2</sup>, Aijun Tan <sup>6,\*</sup> and Liegang Liu <sup>1,2,\*</sup>

## Supplementary Table S1-S3

### Table of Contents

**Table S1** Subgroup analyses of plasma selenium concentrations with risk of MetS and its components stratified by sex.

**Table S2** Characteristics of MetS cases and controls genotyped of the rs7579 polymorphism.

**Table S3** Subgroup analyses of rs7579 polymorphism with risk of MetS and its components stratified by sex.

**Table S1** Subgroup analyses of plasma selenium concentrations with risk of MetS and its components stratified by sex <sup>a</sup>

| Group (n)            | Quartiles of plasma selenium concentrations (µg/L) |                  |                  |             | <i>P</i> value for interaction <sup>b</sup> |
|----------------------|----------------------------------------------------|------------------|------------------|-------------|---------------------------------------------|
|                      | Q1, <82.36                                         | Q2, 82.37-92.60  | Q3, 92.67-103.5  | Q4, ≥103.53 |                                             |
| MetS                 |                                                    |                  |                  |             | 0.158                                       |
| Male (1636)          | 0.83 (0.60-1.15)                                   | 0.76 (0.56-1.05) | 0.66 (0.48-0.91) | 1           |                                             |
| Female (922)         | 0.73 (0.49-1.10)                                   | 0.85 (0.56-1.29) | 0.70 (0.45-1.07) | 1           |                                             |
| Central obesity      |                                                    |                  |                  |             | 0.404                                       |
| Male (1610)          | 1.11 (0.77-1.61)                                   | 1.06 (0.74-1.52) | 0.77 (0.54-1.10) | 1           |                                             |
| Female (917)         | 0.79 (0.48-1.29)                                   | 0.68 (0.41-1.13) | 0.50 (0.30-0.86) | 1           |                                             |
| Hypertriglyceridemia |                                                    |                  |                  |             | 0.709                                       |
| Male (1631)          | 0.75 (0.56-1.01)                                   | 0.68 (0.51-0.91) | 0.65 (0.49-0.86) | 1           |                                             |
| Female (918)         | 0.81 (0.55-1.20)                                   | 0.93 (0.62-1.38) | 0.92 (0.61-1.39) | 1           |                                             |
| Low HDL-C            |                                                    |                  |                  |             | 0.003                                       |
| Male (1632)          | 1.87 (1.34-2.62)                                   | 1.21 (0.85-1.71) | 0.96 (0.67-1.37) | 1           |                                             |
| Female (919)         | 0.85 (0.58-1.25)                                   | 0.74 (0.50-1.11) | 0.73 (0.48-1.10) | 1           |                                             |
| High blood pressure  |                                                    |                  |                  |             | 0.308                                       |
| Male (1448)          | 1.08 (0.78-1.51)                                   | 0.91 (0.66-1.25) | 0.89 (0.65-1.22) | 1           |                                             |
| Female (797)         | 1.24 (0.80-1.90)                                   | 1.33 (0.85-2.07) | 0.69 (0.44-1.09) | 1           |                                             |
| Hyperglycemia        |                                                    |                  |                  |             | 0.525                                       |
| Male (1633)          | 0.53 (0.40-0.72)                                   | 0.80 (0.59-1.08) | 0.91 (0.67-1.24) | 1           |                                             |
| Female (917)         | 0.62 (0.43-0.91)                                   | 0.84 (0.57-1.24) | 0.97 (0.65-1.43) | 1           |                                             |

<sup>a</sup>Odds ratios (95% confidence intervals) were estimated by binary logistic regression after adjustment for sex, age (years), body mass index (kg/m<sup>2</sup>), smoking (current, former, and never), drinking (current, former, and never), vigorous activity (at least once/week or no) and education level (none or elementary school, middle school, and high school or college). HDL-C, high-density lipoprotein cholesterol; MetS, metabolic syndrome.

<sup>b</sup>Interaction tests with multiplicative terms were performed to determine whether risks differed between the subgroups.

**Table S2** Characteristics of MetS cases and controls genotyped of the rs7579 polymorphism <sup>a</sup>

| Characteristics                               | Non-MetS (n=644)     | MetS (n=551)         | <i>P</i> value |
|-----------------------------------------------|----------------------|----------------------|----------------|
| Male, n (%)                                   | 466 (72.4)           | 384 (69.7)           | 0.310          |
| Age (years)                                   | 51.20 (11.08)        | 49.98 (10.67)        | 0.053          |
| BMI (kg/m <sup>2</sup> )                      | 22.71 (2.57)         | 25.98 (2.93)         | <0.001         |
| SBP (mmHg)                                    | 129.41 (16.57)       | 138.63 (19.08)       | <0.001         |
| DBP (mmHg)                                    | 78.92 (10.25)        | 85.85 (11.66)        | <0.001         |
| Waist circumference (cm)                      | 81.89 (7.32)         | 91.35 (7.68)         | <0.001         |
| Triglycerides (mmol/L)                        | 1.09 (0.77-1.42)     | 1.90 (1.44-2.61)     | <0.001         |
| Total cholesterol (mmol/L)                    | 4.42 (3.91-5.00)     | 4.90 (4.25-5.57)     | <0.001         |
| HDL-C (mmol/L)                                | 1.35 (1.18-1.53)     | 1.23 (0.97-1.38)     | 0.948          |
| LDL-C (mmol/L)                                | 2.45 (1.79-2.99)     | 2.42 (1.75-3.10)     | <0.001         |
| Fasting plasma glucose (mmol/L)               | 5.68 (0.92)          | 6.35 (1.48)          | <0.001         |
| Fasting plasma insulin (mU/L)                 | 6.63 (4.78-9.45)     | 10.57 (7.60-14.66)   | <0.001         |
| HOMA-IR                                       | 1.64 (1.11-2.47)     | 2.87 (2.01-4.04)     | <0.001         |
| HOMA-β                                        | 62.44 (46.81-91.77)  | 82.89 (57.15-122.00) | <0.001         |
| Current smoker, n (%)                         | 264 (41.0)           | 210 (38.1)           | 0.310          |
| Current drinker, n (%)                        | 226 (35.1)           | 186 (33.8)           | 0.628          |
| Vigorous activity (at least once/week), n (%) | 237 (36.8)           | 176 (31.9)           | 0.078          |
| Educational level, n (%)                      |                      |                      | 0.617          |
| None or elementary school                     | 133 (20.7)           | 103 (18.7)           |                |
| Middle school                                 | 291 (45.2)           | 248 (45.0)           |                |
| High school or college                        | 220 (34.2)           | 200 (36.3)           |                |
| Selenium (μg/L)                               | 92.46 (82.18-104.31) | 95.72 (85.55-108.89) | 0.001          |
| SELENOP rs7579                                |                      |                      | 0.416          |
| Allele G                                      | 962 (74.7)           | 806 (73.1)           |                |
| Allele A                                      | 326 (25.3)           | 296 (26.9)           |                |

<sup>a</sup>Data are presented as n (%) for categorical data, means (standard deviations) for parametrically distributed data, or medians (interquartile ranges)

for nonparametrically distributed data. BMI, body mass index; DBP, diastolic blood pressure; HDL-C, high-density lipoprotein cholesterol; LDL-C, low-density lipoprotein cholesterol; MetS, metabolic syndrome; SBP, systolic blood pressure.

**Table S3** Subgroup analyses of rs7579 polymorphism with risk of MetS and its components stratified by sex <sup>a</sup>

| Group (n)            | rs7579 genotypes |                  |                  |                  | <i>P</i> value for interaction <sup>b</sup> |
|----------------------|------------------|------------------|------------------|------------------|---------------------------------------------|
|                      | GG genotype      | GA genotype      | AA genotype      | GA+AA genotype   |                                             |
| MetS                 |                  |                  |                  |                  | 0.091                                       |
| Male (850)           | 1                | 1.75 (1.23-2.50) | 1.25 (0.69-2.28) | 1.64 (1.18-2.29) |                                             |
| Female (345)         | 1                | 0.85 (0.50-1.45) | 0.80 (0.33-1.95) | 0.84 (0.51-1.38) |                                             |
| Central obesity      |                  |                  |                  |                  | 0.406                                       |
| Male (831)           | 1                | 1.52 (1.01-2.29) | 1.12 (0.56-2.25) | 1.44 (0.98-2.11) |                                             |
| Female (343)         | 1                | 1.04 (0.56-1.92) | 0.87 (0.33-2.31) | 1.00 (0.56-1.77) |                                             |
| Hypertriglyceridemia |                  |                  |                  |                  | 0.656                                       |
| Male (847)           | 1                | 1.16 (0.84-1.60) | 1.22 (0.71-2.10) | 1.17 (0.86-1.58) |                                             |
| Female (343)         | 1                | 0.99 (0.56-1.76) | 1.71 (0.69-4.25) | 1.12 (0.66-1.89) |                                             |
| Low HDL-C            |                  |                  |                  |                  | 0.168                                       |
| Male (847)           | 1                | 1.42 (0.98-2.06) | 1.40 (0.76-2.61) | 1.42 (1.00-2.01) |                                             |
| Female (344)         | 1                | 0.86 (0.52-1.44) | 1.23 (0.52-2.93) | 0.93 (0.57-1.50) |                                             |
| High blood pressure  |                  |                  |                  |                  | 0.412                                       |
| Male (735)           | 1                | 0.86 (0.62-1.19) | 1.47 (0.81-2.66) | 0.94 (0.69-1.29) |                                             |
| Female (278)         | 1                | 1.65 (0.93-2.94) | 1.06 (0.38-3.00) | 1.53 (0.89-2.64) |                                             |
| Hyperglycemia        |                  |                  |                  |                  | 0.533                                       |
| Male (847)           | 1                | 1.21 (0.87-1.70) | 0.87 (0.50-1.52) | 1.14 (0.83-1.56) |                                             |
| Female (343)         | 1                | 1.20 (0.74-1.94) | 0.51 (0.22-1.20) | 1.02 (0.65-1.59) |                                             |

<sup>a</sup>Odds ratios (95% confidence intervals) were estimated by binary logistic regression after adjustment for sex, age (years), body mass index (kg/m<sup>2</sup>), smoking (current, former, and never), drinking (current, former, and never), vigorous activity (at least once/week or no) and education level (none or elementary school, middle school, and high school or college). HDL-C, high-density lipoprotein cholesterol; MetS, metabolic syndrome.

<sup>b</sup>Interaction tests with multiplicative terms were performed to determine whether risks differed between the subgroups.

# Supplementary Figure S1

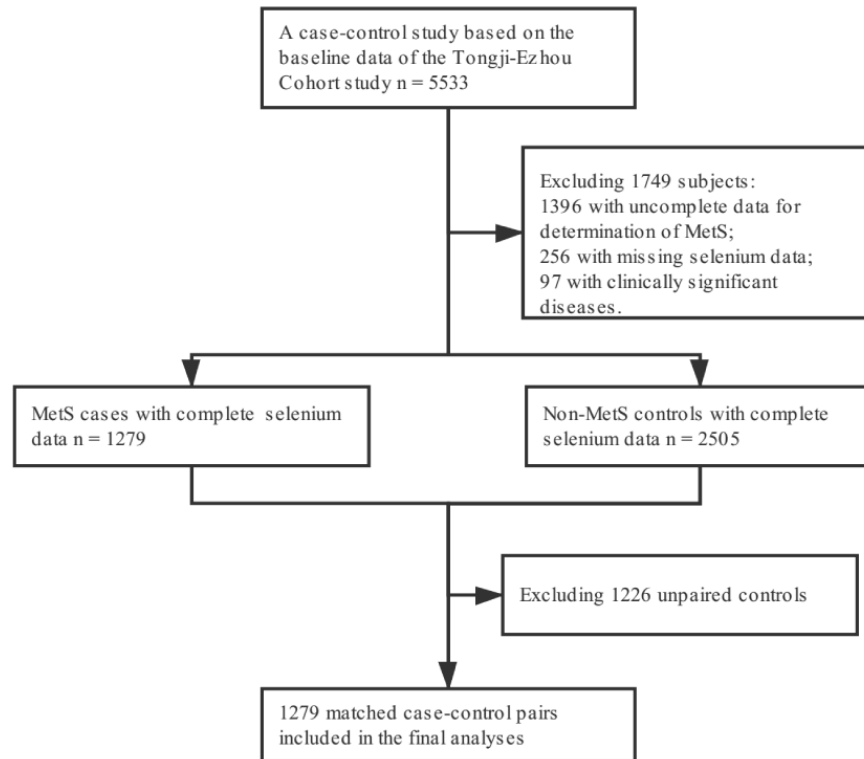

Figure S1. The flow chart of participants recruitment and case-control selection.
